## 1 **SARS-CoV-2 wildlife surveillance in Ontario and Québec, Canada**

2 Janet E. Greenhorn<sup>1</sup> and Jonathon D. Kotwa<sup>2</sup>, Jeff Bowman<sup>1</sup>, Laura Bruce<sup>1</sup>, Tore Buchanan<sup>1</sup>,  
3 Peter A. Buck<sup>3</sup>, Antonia Dibernardo<sup>4</sup>, Logan Flockhart<sup>3</sup>, Marianne Gagnier<sup>5</sup>, Aaron Hou<sup>2</sup>, Claire  
4 M. Jardine<sup>6</sup>, Stephane Lair<sup>7</sup>, L. Robbin Lindsay<sup>4</sup>, Ariane Masse<sup>5</sup>, Pia K. Muchaal<sup>3</sup>, Larissa A.  
5 Nituch<sup>1</sup>, Angelo Sotto<sup>2</sup>, Brian Stevens<sup>6</sup>, Lily Yip<sup>2</sup>, Samira Mubareka<sup>2,8</sup>

- 6 1. Wildlife Research and Monitoring Section, Ontario Ministry of Northern Development,  
7 Mines, Natural Resources and Forestry, Peterborough, ON  
8 2. Sunnybrook Research Institute, Toronto, ON  
9 3. Centre for Food-borne, Environmental and Zoonotic Infectious Diseases, Public Health  
10 Agency of Canada  
11 4. National Microbiology Laboratory, Public Health Agency of Canada, Winnipeg, MB  
12 5. Ministère des Forêts, de la Faune et des Parcs du Québec, Québec, QC  
13 6. Canadian Wildlife Health Cooperative, Ontario-Nunavut, Department of Pathobiology,  
14 University of Guelph, Guelph, ON  
15 7. Canadian Wildlife Health Cooperative, Québec, Sainte-Hyacinthe, QC  
16 8. Department of Laboratory Medicine and Pathobiology, University of Toronto, Toronto,  
17 ON

18

19

## 20 **Abstract**

## 21 **Background**

22 Severe acute respiratory syndrome coronavirus 2 (SARS-CoV-2), the virus responsible for the  
23 COVID-19 pandemic, is capable of infecting a variety of wildlife species. Wildlife living in close  
24 contact with humans are at an increased risk of SARS-CoV-2 exposure and if infected have the  
25 potential to become a reservoir for the pathogen, making control and management more  
26 difficult.

## 27 **Objective**

28 To conduct SARS-CoV-2 surveillance in urban wildlife from Ontario and Québec, Canada,  
29 increasing our knowledge of the epidemiology of the virus and our chances of detecting  
30 spillover from humans into wildlife.

## 31 **Methods**

32 Using a One Health approach, we leveraged activities of existing research, surveillance, and  
33 rehabilitation programs among multiple agencies to collect samples from 776 animals from 17  
34 different wildlife species between June 2020 and May 2021. Samples from all animals were  
35 tested for the presence of SARS-CoV-2 viral RNA, and a subset of samples from 219 animals  
36 across 3 species (raccoons, *Procyon lotor*; striped skunks, *Mephitis mephitis*; and mink,  
37 *Neovison vison*) were also tested for the presence of neutralizing antibodies.

## 38 **Results**

39 No evidence of SARS-CoV-2 viral RNA or neutralizing antibodies was detected in any of the  
40 tested samples.

## 41 **Conclusion**

42 Although we were unable to identify positive SARS-CoV-2 cases in wildlife, continued research  
43 and surveillance activities are critical to better understand the rapidly changing landscape of  
44 susceptible animal species. Collaboration between academic, public and animal health sectors  
45 should include experts from relevant fields to build coordinated surveillance and response  
46 capacity.

## 47 **Introduction**

48 The severe acute respiratory syndrome coronavirus 2 (SARS-CoV-2) is responsible for the global  
49 COVID-19 pandemic and has been maintained through human-to-human transmission.

50 However, humans are not the only species susceptible to infection. Over the course of the  
51 current pandemic, a range of domestic and wild animal species have been reported to either be  
52 naturally infected with SARS-CoV-2 or susceptible to the virus in experimental infections (1, 2,  
53 3). Others have been identified as potential hosts based on sequence analysis of the host cell  
54 receptor of SARS-CoV-2, angiotensin 1 converting enzyme 2 (ACE2), and predicted binding  
55 affinity (4, 5).

56 Many wild animal species thrive in the ecological overlap with humans and are thus at an  
57 increased risk of being exposed to SARS-CoV-2 (6). Several of these peri-domestic species have  
58 been experimentally shown to become infected with and shed SARS-CoV-2 (7, 8). SARS-CoV-2  
59 infection has also been reported in wild or free-ranging animals that have been naturally  
60 exposed, including American mink (*Neovison vison*; 9) and, more recently, white-tailed deer  
61 (*Odocoileus virginianus*; 10, 11).

62 The concept of One Health recognizes that human health and animal health are interdependent  
63 (12). The spillover of virus from humans or domestic animals into wildlife is concerning not only  
64 due to the possible deleterious effects on wildlife, but because these wild populations have the  
65 potential to act as reservoirs for SARS-CoV-2. Diseases that have an animal reservoir are  
66 inherently much more difficult to control and the spread of SARS-CoV-2 through animal  
67 populations could further contribute to the development of variants of concern (VoCs),

68 potentially undermining the efficacy of medical countermeasures such as antivirals and  
69 vaccines (13, 14). Additionally, people who have close contact with wildlife, such as biologists,  
70 wildlife rehabilitators, and hunters and trappers, may be at higher risk of being exposed to the  
71 virus and of facilitating its spread among wildlife. The impact of SARS-CoV-2 infection on  
72 wildlife health is not fully understood. Early detection of any spillover is therefore critical to  
73 preventing and addressing these concerns.

74 Given the risk of reverse-zoonotic SARS-CoV-2 transmission and our lack of knowledge of the  
75 virus in local wildlife, there was an urgent need to elucidate the epidemiology of the virus at the  
76 human-wildlife interface to help wildlife management and public health officials better  
77 communicate risk and plan management strategies. We therefore conducted SARS-CoV-2  
78 surveillance in wildlife across Ontario and Québec, Canada, with a major focus on the southern  
79 regions of both provinces. These areas have high human population densities and include  
80 major urban centres such as Toronto and Montréal. Incidences of COVID-19 peaked in  
81 Montréal and the surrounding regions in early January 2021, with rates exceeding 400 cases per  
82 100,000 population in Montréal and Laval (15). Incidences in Toronto and the surrounding  
83 regions peaked in April 2021, with case rates in the City of Toronto and Peel also exceeding 400  
84 per 100,000 population (15).

## 85 **Methods**

86 Many experts have recommended a One Health approach for animal SARS-CoV-2 testing, which  
87 balances concerns for both human and animal health and is based on knowledge of experts in  
88 both fields (16, 17). As such, our work was conducted through consultation and cooperation

89 among a wide variety of agencies: the Public Health Agency of Canada (PHAC), the Ontario  
90 Ministry of Northern Development, Mines, Natural Resources and Forestry (NDMNRF), le  
91 Ministère des Forêts, de la Faune et des Parcs du Québec (MFFP), the Canadian Wildlife Health  
92 Cooperative (CWHC), the Ontario Ministry of Agriculture, Food, and Rural Affairs (OMAFRA), the  
93 Canadian Food Inspection Agency (CFIA), the Western College of Veterinary Medicine, the  
94 Granby Zoo, the National Microbiology Laboratory (NML) of PHAC, and Sunnybrook Research  
95 Institute (SRI). We focussed our surveillance primarily on animals from urban areas or those  
96 with a case history of close contact with people since these animals would be at the highest risk  
97 of exposure to people infected with SARS-CoV-2. All samples for testing were collected  
98 between June 2020 and May 2021 through pre-existing partnerships or over the course of  
99 other research, surveillance, or rehabilitation work (Table 1).

## 100 **Raccoons and skunks**

101 Raccoons (*Procyon lotor*) and striped skunks (*Mephitis mephitis*) are peri-domestic species that  
102 are good candidates for reverse-zoonotic disease surveillance due to their high density in urban  
103 areas and their frequent close contact with people, pets, and refuse. They are also subject to  
104 ongoing rabies surveillance operations in both Ontario and Québec, making them easy to  
105 sample. In Ontario, wildlife rabies surveillance and testing are conducted by the NDMNRF on  
106 roadkill, animals found dead for other reasons, and deceased sick or strangely acting wildlife.  
107 Submissions are received mainly from southwestern Ontario, and most animals received by the  
108 program and subsequently sampled and tested for SARS-CoV-2 came from urban centres within  
109 this region (Figure 1). In Québec, a similar wildlife rabies surveillance program is coordinated

110 by the MFFP and testing and other post-mortem examinations are performed by the Québec  
111 CWHC. As was the case in Ontario, animals sampled by the Québec CWHC for SARS-CoV-2  
112 testing came mainly from urban areas (Figure 1). The Ontario CWHC laboratory also  
113 contributed a small number of raccoon and skunk samples from animals submitted to them for  
114 post-mortem examination. Carcasses were sampled using a combination of oral, nasal, and  
115 rectal swabs, respiratory tissue, and intestinal tissue (Table 1). Swabs were stored in individual  
116 2 mL tubes with ~1 mL of universal transport medium (UTM; Sunnybrook Research Institute)  
117 and 30-60 mg tissue samples were stored dry in tubes.

118 Additionally, samples were collected from live raccoons and skunks during an annual  
119 seroprevalence study conducted by the NDMNRF in Oakville, Ontario to assess the  
120 effectiveness of rabies vaccine baiting (NDMNRF Wildlife Animal Care Committee Protocol  
121 #358). Animals were captured in live traps and transported to a central processing station  
122 where they were anaesthetized. Oral and rectal swabs were collected for PCR testing. Blood  
123 was drawn from the brachiocephalic vein and 0.2-1.0 mL of sera was collected for antibody  
124 testing. Following reversal and successful recovery, animals were returned to their point of  
125 capture and released.

## 126 **Mink**

127 Instances of SARS-CoV-2 infection in mink have already been identified in multiple countries,  
128 including Canada, and infected farmed mink have proven capable of passing the virus to naïve  
129 conspecifics, humans, and domestic and feral companion animals (18, 19, 20, 21, 22). At the  
130 time of writing no mink farm outbreaks have been reported in Ontario or Québec, but mink

131 farms in Ontario have previously been shown to act as points of infection for other viruses (e.g.  
132 Aleutian Mink Disease), which can spread to wild mink populations (23).  
133 The majority of mink carcasses we sampled for SARS-CoV-2 were submitted to the NDMNRF by  
134 licensed fur harvesters through a collaboration with the Ontario Fur Managers Federation. The  
135 NDMNRF staff collected oral and rectal swabs, lung tissue, and intestinal tissue from the  
136 carcasses, as well as cardiac blood samples via cardiac puncture for antibody testing. If blood  
137 could not be obtained from the heart, fluid was collected from the chest cavity on a Nobuto  
138 filter strip (Advantec MFS, Inc, Dublin, CA, USA). Nobuto strips were allowed to air dry, then  
139 placed in individual coin envelopes.

#### 140 **Big brown bats**

141 Bats are known carriers of coronaviruses (24, 25, 26). As such, concerns have been raised over  
142 the possible susceptibility of North American bats to SARS-CoV-2 (27). Species such as the big  
143 brown bat (*Eptesicus fuscus*) frequently roost in buildings, which brings them into close contact  
144 with people and increases the likelihood of SARS-CoV-2 exposure. Big brown bat oral swabs  
145 and guano samples for SARS-CoV-2 PCR testing were collected by staff at the Granby Zoo, which  
146 runs a rehabilitation program over the winter to care for bats that have been disturbed during  
147 their hibernation. Guano samples were stored dry in 2 mL tubes.

#### 148 **Other species**

149 Other samples for SARS-CoV-2 PCR testing were obtained opportunistically through the Ontario  
150 and Québec regional CWHC laboratories, which receive a wide variety of wildlife species for

151 post-mortem examination (Table 1). Animals were selected for sampling based on potential for  
152 SARS-CoV-2 infection. This could be due to urban habitat, human contact, or to predicted  
153 species susceptibility based on prior research. The number and type of samples collected  
154 varied by carcass and depended on carcass condition (Table 1).

### 155 **RNA Extraction**

156 RNA extraction and PCR testing were performed at the SRI in Toronto, Ontario. All swab, tissue,  
157 and guano samples were stored at -80 °C prior to testing. For oral, rectal, or nasal swab  
158 samples, RNA extractions were performed using 140 µL of sample via the QIAmp viral RNA mini  
159 kit (Qiagen, Mississauga, ON, Canada) or the Nuclisens EasyMag using Generic Protocol 2.0.1  
160 (bioMérieux Canada Inc., St-Laurent, QC, Canada) according to manufacturer's instructions;  
161 RNA was eluted in 50 µL. RNA from 80 mg of guano samples were extracted via the QIAmp viral  
162 RNA mini kit and eluted in 40 µL. Tissue samples were thawed, weighed, minced with a scalpel,  
163 and homogenized in 600 µL of lysis buffer using the Next Advance Bullet Blender (Next  
164 Advance, Troy, NY, USA) and a 5 mm stainless steel bead at 5 m/s for 3 minutes. RNA from 30  
165 mg tissue samples was extracted via the the RNeasy Plus Mini kit (Qiagen, Mississauga, ON,  
166 Canada) or the Nuclisens EasyMag using Specific Protocol B 2.0.1; RNA was eluted in 50 µL. All  
167 extractions were performed with a negative control.

### 168 **SARS-CoV-2 PCR analysis**

169 Reverse-transcription polymerase chain reaction (RT-PCR) was performed using the Luna  
170 Universal Probe One-Step RT-qPCR kit (NEB). Two gene targets were used for SARS-CoV-2 RNA  
171 detection: the 5' untranslated region (UTR) and the envelope (E) gene. The cycling conditions



172 were: 1 cycle of denaturation at 60 °C for 10 minutes then 95 °C for 2 minutes followed by 44  
173 amplification cycles of 95°C for 10 seconds and 60°C for 15 seconds. Quantstudio 3 software  
174 (Thermo Fisher Scientific Inc., Waltham, MA, USA) was used to determine cycle thresholds (Ct).  
175 All samples were run in duplicate and samples with Cts <40 for both gene targets in at least one  
176 replicate were considered positive.

### 177 **Antibody testing**

178 Antibody testing was performed on cardiac blood, chest cavity fluid and serum samples at the  
179 NML in Winnipeg, Manitoba. All samples were stored at -20 °C prior to testing. Cardiac blood  
180 samples were collected onto Nobuto filter strips (Advantec MFS, Inc, Dublin, CA, USA; Fisher  
181 Scientific, Waltham, MA, USA) by saturating the length of the strip with 100 µl of blood. To  
182 obtain the 1:9 dilution required for testing, saturated Nobuto strips were cut into 4-5 pieces  
183 and placed into a 2 mL tube containing 360 µl phosphate buffered saline (PBS) pH 7.4  
184 containing 0.05% Tween 20 and eluted overnight at 4 °C. Nobuto strips collected from chest  
185 cavity fluid were processed in the same way, whereas serum samples were diluted 1:9 with  
186 Sample Dilution Buffer. Samples were mixed by vortexing and tested using the GenScript  
187 cPass™ SARS-CoV-2 Neutralization Antibody Detection Kit (GenScript USA, Inc. Piscataway, NJ,  
188 USA) according to the manufacturer's protocol.

189 Briefly, 60 µl of a sample was added to 60 µl HRP-conjugated RBD solution and incubated at 37  
190 °C for 30 minutes. A 100 µl aliquot of the mixture was transferred to the ELISA microwell test  
191 plate and incubated at 37 °C for 15 minutes. Microwells were washed 4 times with 260 µl wash  
192 buffer then 100 µl TMB substrate was added to each well. Following a 20 minute incubation in

193 the dark at room temperature, 50 µl of Stop Solution was added to each well. Absorbance was  
194 read immediately at 450 nm.

195 Each assay plate included positive and negative controls that met required quality control  
196 parameters. Percentage inhibition was calculated for each sample using the following equation:

197  $\text{Percent Inhibition} = (1 - \text{Optical Density Sample} / \text{Optical Density Negative Control}) \times 100\%$

198 Samples with greater than or equal to 30% inhibition were considered positive for SARS-CoV-2  
199 neutralizing antibodies.

## 200 **Results**

201 We tested 776 individual animals from 17 different wildlife species for SARS-CoV-2. These  
202 animals were collected primarily from urban areas in southern Ontario and Québec between  
203 June 2020 and May 2021 (Table 1). We found no evidence of SARS-CoV-2 viral RNA in any of  
204 the tested samples and no evidence of neutralizing antibodies in a subset of 219 individuals  
205 (141 raccoons, 36 striped skunks, 42 mink).

## 206 **Discussion**

207 Our study did not detect any spillover of SARS-CoV-2 to wildlife in Ontario and Québec.  
208 Raccoons and skunks were the most commonly tested species. Results from experimental  
209 studies have suggested these species may be susceptible to SARS-CoV-2, but the lack of and low  
210 quantity of infectious virus from raccoons and skunks, respectively, suggest they are an unlikely  
211 reservoir for SARS-CoV-2 in the absence of viral adaptations (7, 8). Similarly, a recent challenge  
212 study with big brown bats found that they are resistant to SARS-CoV-2 infection and do not

213 shed infectious virus (28). Conversely, mink are susceptible to SARS-CoV-2 infection, but we did  
214 not detect evidence of SARS-CoV-2 in any of the mink sampled. While this could be attributed  
215 to our low effective sample size, to date SARS-CoV-2 has been infrequently detected in wild  
216 mink populations globally. It should be noted, however, that the abovementioned experimental  
217 studies on raccoons, skunks, and big brown bats were conducted using parental SARS-CoV-2.  
218 The susceptibility of these species to VoCs is presently not known and may differ from  
219 susceptibility to the parental strain (29). Additionally, challenge studies assessing susceptibility  
220 tend to be conducted on small numbers of young, healthy individuals, so results may not be  
221 reflective of the full range of possible responses to infection in the wild.

222 As the pandemic progresses, new evidence is emerging on susceptible wildlife that may act as  
223 competent reservoirs for the virus. For example, white-tailed deer are now considered a highly  
224 relevant species for SARS-CoV-2 surveillance in light of their experimentally determined  
225 susceptibility as well as evidence of widespread exposure to the virus via antibody and PCR  
226 testing across the northeastern USA (10, 11, 30). Continued surveillance efforts should be  
227 adaptive and include targeted testing of highly relevant species as they are identified. In  
228 Ontario and Québec, these would include mink, white-tailed deer, and deer mice (*Peromyscus*  
229 *maniculatus*; 7, 31). Continuing to include less susceptible species remains important given  
230 ongoing viral genomic plasticity and changing host range of VoCs.

### 231 **Limitations**

232 There are several limitations for this study that need to be acknowledged. First, the majority of  
233 our SARS-CoV-2 testing was done by RT-PCR, which is only capable of detecting active infection.

234 Antibody testing, which identifies resolved infection or exposure, is more likely to find evidence  
235 of SARS-CoV-2 in surveillance studies since results are less dependent on timing of sample  
236 collection. Antibody testing typically requires samples from live animals or fresh carcasses,  
237 which limited our ability to use it. However, the testing performed allowed for test validation in  
238 raccoons, skunks, and mink which may facilitate more antibody testing in future. Second, the  
239 type of samples we collected may also have limited our ability to detect SARS-CoV-2 infection.  
240 Viral replication can vary among tissue types and therefore some tissues are more optimal for  
241 viral RNA detection than others (1). In the present work, animals were sampled  
242 opportunistically as a part of pre-existing surveillance efforts, research, and rehabilitation  
243 programs and we were not able to consistently collect the same sample sets from all animals.  
244 Additionally, the sample types were from live animals and carcasses and not optimized; certain  
245 sample types were sometimes unavailable (e.g. tissue samples from live animals) or were not  
246 sufficient for collection.

## 247 **Conclusion**

248 A One Health approach is critical to understanding and managing the risks of an emerging  
249 zoonotic pathogen such as SARS-CoV-2. We leveraged activities of existing surveillance,  
250 research, and rehabilitation programs and expertise from multiple fields to efficiently collect  
251 and test 1,690 individual wildlife samples. The absence of SARS-CoV-2-positive wildlife samples  
252 does not exclude spillover from humans to Canadian wildlife, given the limitations cited above.  
253 Continued research in this area is both important and pressing, particularly as novel VoCs  
254 emerge. Public and animal health sectors should continue to work collaboratively with

255 academic and government partners to help prevent the spread of SARS-CoV-2 from people to  
256 wildlife, monitor for spillover, and address any issues should they arise. There is an urgent  
257 need for a coordinated wildlife surveillance program for SARS-CoV-2 in Canada. This approach  
258 will help protect the health of both Canadians and wildlife, now and in the future.

## 259 **Author's Statement**

260 JEG, JDK, JB, TB, PAB, LF, MG, CMJ, AM, PKM, LAN, SM - conceptualization

261 JEG, LB, MG, CMJ, SL, AM, BS - sample collection and coordination

262 JDK, AD, AH, LRL, AS, LY, SM – sample testing

263 JEG, JDK - resources

264 JEG, JDK, AD, LF – writing, original draft

265 JEG, JDK, JB, LB, TB, PAB, AD, LF, MG, AH, CMJ, SL, LRL, AM, PKM, LAN, AS, BS, LY, SM - writing,

266 review and editing

267 JB, TB, PAB, PKM – funding acquisition

268 JEG and JDK contributed equally to this work.

## 269 **Competing Interests**

270 None.

## 271 **Acknowledgements**

272 The authors wish to thank B. Pickering and J. Tataryn for facilitating the inter-agency

273 partnerships that made this work possible, and for their thoughtful review and comments on

274 the manuscript. We also wish to acknowledge B. Pickering for helping to arrange antibody

275 testing, and N. P. L. Toledo for performing the antibody testing. We are grateful for the work of  
276 D. Bulir in developing the PCR testing assay used in this study. We wish to thank L. Lazure and  
277 the staff of the Granby Zoo, the technicians of the Québec rabies surveillance program, and V.  
278 Casaubon and J. Viau of the CWHC Québec for their help with sample collection. We are also  
279 grateful for the sample collection assistance of N. Pulham, S. Konieczka, J. Adams, G. McCoy, T.  
280 McGee, L. Pollock, and K. Bennett at the Wildlife Research and Monitoring Section of the  
281 NDMNRF and L. Dougherty, L. Shirose, and M. Alexandrou at the CWHC Ontario. Finally, we  
282 wish to thank the licensed fur harvesters who submitted mink for testing.

### 283 **Funding**

284 This work was supported by the Public Health Agency of Canada, with in-kind contributions  
285 provided by all collaborating partners.

286

## 287   **References**

- 288       1   Shi J, Wen Z, Zhong G, Yang H, Wang C, Huang B, Liu R, He X, Shuai L, Sun Z, Zhao Y, Liu  
289       P, Liang L, Cui P, Wang J, Zhang X, Guan Y, Tan W, Wu G, Chen H, Bu Z. Susceptibility of  
290       ferrets, cats, dogs, and other domesticated animals to SARS-coronavirus 2. *Science*  
291       2020;368:1016-1020. <https://doi.org/10.1126/science.abb7015>
- 292       2   Hobbs EC, Reid TJ. Animals and SARS-CoV-2: species susceptibility and viral transmission  
293       in experimental and natural conditions, and the potential implications for community  
294       transmission. *Transbound Emerg Dis* 2020;00:1-18. <https://doi.org/10.1111/tbed.13885>
- 295       3   Bonilla-Aldana DK, García-Barco A, Jimenez-Diaz SD, Bonilla-Aldana JL, Cardona-Trujillo  
296       MC, Muñoz-Lara F, Zambrano LI, Salas-Matta LA, Rodriguez-Morales AJ. SARS-CoV-2  
297       natural infection in animals: a systematic review of studies and case reports and series.  
298       *Vet Quart* 2021;41:250-267. <https://doi.org/10.1080/01652176.2021.1970280>
- 299       4   Damas J, Hughes GM, Keough KC, Painter CA, Persky NS, Corbo M, Hiller M, Koepfli K-P,  
300       Pfenning AR, Zhao H, Genereux DP, Swofford R, Pollard KS, Ryder OA, Nweeia MT,  
301       Lindblad-Toh K, Teeling EC, Karlsson EK, Lewin HA. Broad host range of SARS-CoV-2  
302       predicted by comparative and structural analysis of ACE2 in vertebrates. *PNAS*  
303       2020;117:22311-22322. <https://doi.org/10.1073/pnas.2010146117>
- 304       5   Alexander MR, Schoeder CT, Brown JA, Smart CD, Moth C, Wikswow JP, Capra JA, Meiler J,  
305       Chen W, Madhur MS. Predicting susceptibility to SARS-CoV-2 infection based on  
306       structural differences in ACE2 across species. *FASEB J* 2020;34:15946-15960.  
307       <https://doi.org/10.1096/fj.202001808R>
- 308       6   Franklin AB, Bevins AN. Spillover of SARS-CoV-2 into novel wild hosts in North America: a  
309       conceptual model for perpetuation of the pathogen. *Sci Total Environ* 2020;733.  
310       <https://doi.org/10.1016/j.scitotenv.2020.139358>
- 311       7   Bosco-Lauth AM, Root JJ, Porter SM, Walker AE, Guilbert L, Hawvermale D, Pepper A,  
312       Maison RM, Hartwig AE, Gordy P, Bielefeldt-Ohmann H, Bowen RA. Survey of  
313       peridomestic mammal susceptibility to SARS-CoV-2 infection. *bioRxiv* 2021.  
314       <https://doi.org/10.1101/2021.01.21.427629>
- 315       8   Francisco R, Hernandez SM, Mead DG, Adcock KG, Burke SC, Nemeth NM, Yabsley MJ.  
316       Experimental susceptibility of North American raccoons (*Procyon lotor*) and striped  
317       skunks (*Mephitis mephitis*) to SARS-CoV-2. *bioRxiv* 2021.  
318       <https://doi.org/10.1101/2021.03.06.434226>
- 319       9   Aguiló-Gisbert J, Padilla-Blanco M, Lizana V, Maiques E, Muñoz-Baquero M, Chillida-  
320       Martínez E, Cardells J, Rubio-Guerri C. First description of SARS-CoV-2 infection in two  
321       feral American mink (*Neovison vison*) caught in the wild. *Animals* 2021;11:1422.  
322       <https://doi.org/10.3390/ani11051422>

- 323 10 Chandler JC, Bevins SN, Ellis JW, Linder TJ, Tell RM, Jenkins-Moore M, Root JJ, Lenocho JB,  
324 Robbe-Austerman S, DeLiberto TJ, Gidlewski T, Torchetti MK, Shriner SA. SARS-CoV-2  
325 exposure in wild white-tailed deer (*Odocoileus virginianus*). bioRxiv 2021.  
326 <https://doi.org/10.1101/2021.07.29.454326>
- 327 11 Hale VL, Dennis PM, McBride DS, Nolting JM, Madden C, Huey D, Ehrlich M, Grieser J,  
328 Winston J, Lombardi D, Gibson S, Saif L, Killian ML, Lantz K, Tell R, Torchetti M, Robbe-  
329 Austerman S, Nelson MI, Faith SA, Bowman AS. SARS-CoV-2 infection in free-ranging  
330 white-tailed deer (*Odocoileus virginianus*). bioRxiv 2021.  
331 <https://doi.org/10.1101/2021.11.04.467308>
- 332 12 World Organization for Animal Health (OIE). One Health. 2021.  
333 <https://www.oie.int/en/what-we-do/global-initiatives/one-health/>
- 334 13 Larsen HD, Fonager J, Lomholt FK, Dalby T, Benedetti G, Kristensen B, Urth TR,  
335 Rasmussen M, Lassaunière R, Rasmussen TB, Strandbygaard B, Lohse L, Chaine M,  
336 Møller KL, Berthelsen AN, Nørgaard SK, Sönksen UW, Boklund AE, Hammer AS, Belsham  
337 GJ, Krause TG, Mortensen S, Bøtner A, Fomsgaard A, Mølbak K. Preliminary report of an  
338 outbreak of SARS-CoV-2 in mink and mink farmers associated with community spread,  
339 Denmark, June to November 2020. Euro Surveill 2021;26. [https://doi.org/10.2807/1560-  
340 7917.ES.2021.26.5.210009](https://doi.org/10.2807/1560-7917.ES.2021.26.5.210009)
- 341 14 Bashor L, Gagne RB, Bosco-Lauth A, Bowen R, Stenglein M, VandeWoude S. SARS-CoV-2  
342 evolution in animals suggests mechanisms for rapid variant selection. bioRxiv 2021.  
343 <https://doi.org/10.1101/2021.03.05.434135>
- 344 15 Government of Canada. COVID-19 daily epidemiology update: current situation.  
345 [https://health-infobase.canada.ca/covid-19/epidemiological-summary-covid-19-  
346 cases.html?stat=rate&measure=total\\_last7&map=hr#a2](https://health-infobase.canada.ca/covid-19/epidemiological-summary-covid-19-cases.html?stat=rate&measure=total_last7&map=hr#a2)
- 347 16 World Organization for Animal Health (OIE). Considerations for sampling, testing, and  
348 reporting of SARS-CoV-2 in animals. 2020.  
349 [https://www.oie.int/fileadmin/Home/MM/A\\_Sampling\\_Testing\\_and\\_Reporting\\_of SAR  
350 S-CoV-2\\_in\\_animals\\_3\\_July\\_2020.pdf](https://www.oie.int/fileadmin/Home/MM/A_Sampling_Testing_and_Reporting_of_SAR)
- 351 17 Delahay RJ, de la Fuente J, Smith GC, Sharun K, Snary EL, Flores Girón L, Nziza J, Fooks  
352 AR, Brookes SM, Lean FZX, Breed AC, Gortazar C. Assessing the risks of SARS-CoV-2 in  
353 wildlife. One Health Outlook 2021;3:7. <https://doi.org/10.1186/s42522-021-00039-6>
- 354 18 Oreshkova N, Molenaar RJ, Vreman S, Harders F, Oude Munnink BB, Hakze-van der  
355 Honing, Gerhards N, Tolsma P, Bouwstra R, Sikkema RS, Tacke MGJ, de Rooij MMT,  
356 Weesendorp E, Engelsma MY, Brusckke CJM, Smit LAM, Koopmans M, van der Poel  
357 WHM, Stegeman A. SARS-CoV-2 infection in farmed minks, Netherlands, April and May  
358 2020. Euro Surveill 2020;25:23. [https://doi.org/10.2807/1560-  
359 7917.ES.2020.25.23.2001005](https://doi.org/10.2807/1560-7917.ES.2020.25.23.2001005)



- 360 19 ProMED. PRO/AH/EDR> COVID-19 update (531): animal, Canada (BC) mink, OIE. 2020.  
361 <https://promedmail.org/promed-post/?id=8008864>
- 362 20 Hammer AS, Quaade ML, Rasmussen TB, Fonager J, Rasmussen M, Mundbjerg K, Lohse  
363 L, Strandbygaard B, Jørgensen CS, Alfaro-Núñez A, Rosenstjerne MW, Boklund A, Halasa  
364 T, Fomsgaard A, Belsham GJ, Bøtner A. SARS-CoV-2 transmission between mink  
365 (*Neovison vison*) and humans, Denmark. *Emerg Infect Dis* 2021;27:547-551.  
366 <https://doi.org/10.3201/eid2702.203794>
- 367 21 Oude Munnink BB, Sikkema RS, Nieuwenhuijse DF, Molenaar RJ, Munger E, Molenkamp  
368 R, van der Spek A, Tolsma P, Rietveld A, Brouwer M, Bouwmeester-Vincken N, Harders  
369 F, Hakze-van der Honing R, Wegdam-Blans MCA, Bouwstra RJ, GuertsvanKessel C, van  
370 der Eijk AA, Velkers FC, Smit LAM, Stegeman A, van der Poel WHM, Koopmans MPG.  
371 Transmission of SARS-CoV-2 on mink farms between humans and mink and back to  
372 humans. *Science* 2021;371:172-177. <https://doi.org/10.1126/science.abe5901>
- 373 22 van Aart AE, Velkers FC, Fischer EAJ, Broens EM, Egberink H, Zhao S, Engelsma M, Hakze-  
374 van der Honing RW, Harders F, de Rooij MMT, Radstake C, Meijer PA, Oude Munnink BB,  
375 de Rond J, Sikkema RS, van der Spek AN, Spierenburg M, Wolters WJ, Molenaar R-J,  
376 Koopmans MPG, van der Poel WHM, Stegeman A, Smit LAM. SARS-CoV-2 infection in  
377 cats and dogs in infected mink farms. *Transbound Emerg Dis* 2021;1:1-7.  
378 <https://doi.org/10.1111/tbed.14173>
- 379 23 Nituch LA, Bowman J, Beauclerc KB, Schulte-Hostedde AI. Mink farms predict Aleutian  
380 disease exposure in wild American mink. *PLoS ONE* 2011;6:e21693.  
381 <https://doi.org/10.1371/journal.pone.0021693>
- 382 24 Dominguez SR, O'Shea TJ, Oko LM, Holmes KV. Detection of group 1 coronaviruses in  
383 bats in North America. *Emerg Infect Dis* 2007;13:1295-1300.  
384 <https://doi.org/10.3201/eid1309.070491>
- 385 25 Misra V, Dumonceaux T, Dubois J, Willis C, Nadin-Davis S, Severini A, Wandeler A,  
386 Lindsay R, Artsob H. Detection of polyoma and corona viruses in bats of Canada. *J Gen  
387 Virol* 2009;90:2015-2022. <http://doi.org/10.1099/vir.0.010694-0>
- 388 26 Ge XY, Li JL, Yang XL, Chmura AA, Zhu G, Epstein JH, Mazet JK, Hu B, Zhang W, Peng C,  
389 Zhang YJ, Luo CM, Tan B, Wang N, Zhu Y, Crameri G, Zhang SY, Wang LF, Daszak P, Shi ZL.  
390 Isolation and characterization of a bat SARS-like coronavirus that uses the ACE-2  
391 receptor. *Nature* 2013;503:535-538. <https://doi.org/10.1038/nature12711>
- 392 27 Olival KJ, Cryan PM, Amman BR, Baric RS, Blehert DS, Brook CE, Calisher CH, Castle KT,  
393 Coleman JTH, Daszak P, Epstein JH, Field H, Frick WF, Gilbert AT, Hayman DTS, Ip HS,  
394 Karesh WB, Johnson CK, Kading RC, Kingston T, Lorch JM, Mendenhall IH, Peel AJ, Phelps  
395 KL, Plowright RK, Reeder DM, Reichard JD, Sleeman JM, Streicker DG, Towner JS, Wang  
396 LF. Possibility for reverse-zoonotic transmission of SARS-CoV-2 to free-ranging wildlife: a

- 397 case study of bats. PLoS Pathog 2020;16:e1008758.  
398 <https://doi.org/10.1371/journal.ppat.1008758>
- 399 28 Hall JS, Knowles S, Nashold SW, Ip HS, Leon AE, Rocke T, Keller S, Carossino M,  
400 Balasuriya U, Hofmeister E. Experimental challenge of a North American bat species, big  
401 brown bat (*Eptesicus fuscus*), with SARS-CoV-2. Transbound Emerg Dis 2020;00:1-10.  
402 <https://doi.org/10.1111/tbed.13949>
- 403 29 Montagutelli X, Prot M, Levillayer L, Baquero Salazar E, Jouvion G, Conquet L, Donati F,  
404 Albert M, Gambaro F, Behillil S, Enouf V, Rousset D, Jaubert J, Rey F, van der Werf S,  
405 Simon-Loriere E. The B.1.351 and P.1 variants extend SARS-CoV-2 host range to mice.  
406 bioRxiv 2021. <https://doi.org/10.1101/2021.03.18.436013>
- 407 30 Palmer MV, Martins M, Falkenberg S, Buckley A, Caserta LC, Mitchell PK, Cassman ED,  
408 Rollins A, Zyllich NC, Renshaw RW, Guarino C, Wagner B, Lager K, Diel DG. Susceptibility  
409 of white-tailed deer (*Odocoileus virginianus*) to SARS-CoV-2. J Virol 2021;95:e00083-21.  
410 <https://doi.org/10.1128/JVI.00083-21>.
- 411 31 Griffin BD, Chan M, Tailor N, Mendoza EJ, Leung A, Warner BM, Duggan AT, Moffat E, He  
412 S, Garnett L, Tran KN, Banadyga L, Albietz A, Tierney K, Audet J, Bello A, Vendramelli R,  
413 Boese AS, Fernando L, Lindsay LR, Jardine CM, Wood H, Poliquin G, Strong JE, Drebot M,  
414 Safronetz D, Embury-Hyatt C, Kobasa D. SARS-CoV-2 infection and transmission in the  
415 North American deer mouse. Nat Commun 2021;12:3612.  
416 <https://doi.org/10.1038/s41467-021-23848-9>

417 **Table 1: Metadata for 776 animals from Ontario and Québec screened for SARS-CoV-2**

| Species                                            | Sampling agency | Sample source                                            | Sample location(s)                                            | Dates of collection   | Number of individuals sampled | Types of samples tested                                  | Test performed | Testing centre |     |
|----------------------------------------------------|-----------------|----------------------------------------------------------|---------------------------------------------------------------|-----------------------|-------------------------------|----------------------------------------------------------|----------------|----------------|-----|
| <b>Raccoon</b><br><i>(Procyon lotor)</i>           | CWHC            | Rabies surveillance (Québec samples), post-mortem exam   | Southern Ontario, Southern Québec                             | Aug 2020-Feb 2021     | 11                            | Respiratory tissue                                       | PCR            | SRI            |     |
|                                                    |                 |                                                          | Southern Québec                                               | Nov-Dec 2020          | 68                            | Respiratory tissue, rectal swab                          |                |                |     |
|                                                    |                 |                                                          | Southern Ontario, Southern Québec                             | Oct 2020-June 2021    | 15                            | Respiratory and intestinal tissue                        |                |                |     |
|                                                    |                 |                                                          | Southwestern Québec                                           | Jan 2021              | 3                             | Nasal swab                                               |                |                |     |
|                                                    |                 |                                                          | Southern Québec                                               | Jan-June 2021         | 54                            | Nasal and rectal swabs                                   |                |                |     |
|                                                    | NDMNRF and CWHC | Rabies surveillance, post-mortem exam                    | Hamilton, Ontario                                             | Dec 2020              | 1                             | Oral and rectal swabs, respiratory and intestinal tissue |                |                |     |
|                                                    | NDMNRF          | Rabies surveillance                                      | Southwestern Ontario                                          | June 2020-Jan 2021    | 100                           | Oral and rectal swabs                                    | Sera           | Antibody       | NML |
| Rabies seroprevalence study                        |                 | Oakville, Ontario                                        | Sept-Oct 2020                                                 | 141                   | Oral and rectal swabs         |                                                          |                |                |     |
| <b>TOTAL RACCOONS SAMPLED</b>                      |                 |                                                          |                                                               |                       | <b>393</b>                    |                                                          |                |                |     |
| <b>Striped Skunk</b><br><i>(Mephitis mephitis)</i> | CWHC            | Rabies surveillance (Québec samples), post-mortem exam   | Southern Québec                                               | Jan-June 2021         | 66                            | Nasal swab                                               | PCR            | SRI            |     |
|                                                    |                 |                                                          | Southern Ontario, Southern Québec                             | July-Dec 2020         | 55                            | Respiratory tissue                                       |                |                |     |
|                                                    |                 |                                                          | Southern Ontario, Southwestern Québec, Saint-Félicien, Québec | Oct 2020-Apr 2021     | 9                             | Respiratory and intestinal tissue                        |                |                |     |
|                                                    | NDMNRF          | Rabies surveillance, rabies seroprevalence study         | Southwestern Ontario                                          | Sept 2020-May 2021    | 104                           | Oral and rectal swabs                                    | Sera           | Antibody       | NML |
|                                                    |                 | Rabies seroprevalence study                              | Oakville, Ontario                                             | Sept-Oct 2020         | 36                            | Oral and rectal swabs                                    |                |                |     |
| <b>TOTAL SKUNKS SAMPLED</b>                        |                 |                                                          |                                                               |                       | <b>270</b>                    |                                                          |                |                |     |
| <b>American Mink</b><br><i>(Neovision vison)</i>   | CWHC            | Post-mortem exam                                         | Thornhill, Ontario                                            | July 2020             | 1                             | Respiratory tissue                                       | PCR            | SRI            |     |
|                                                    | NDMNRF          | Registered fur harvesters, roadkill, rabies surveillance | Southern Ontario                                              | Fall 2020-Spring 2021 | 42 <sup>a</sup>               | Oral and rectal swabs, lung and                          |                |                |     |

|                                                                   |            |                        |                                     |                   |          |                                   |                                   |     |
|-------------------------------------------------------------------|------------|------------------------|-------------------------------------|-------------------|----------|-----------------------------------|-----------------------------------|-----|
|                                                                   |            |                        |                                     |                   |          | intestinal tissue                 |                                   |     |
|                                                                   |            |                        |                                     |                   |          | Cardiac blood or Nobuto strips    | Antibody                          | NML |
| <b>TOTAL MINK SAMPLED</b>                                         |            |                        |                                     |                   | 43       |                                   |                                   |     |
| <b>Big brown bat (<i>Eptesicus fuscus</i>)</b>                    | Granby Zoo | Rehabilitation program | Southwestern Québec                 | Nov 2020-Mar 2021 | 15       | Oral swabs                        | PCR                               | SRI |
|                                                                   |            |                        |                                     |                   | 2        | Guano                             |                                   |     |
|                                                                   |            |                        |                                     |                   | 15       | Oral swabs and guano              |                                   |     |
| <b>TOTAL BIG BROWN BATS SAMPLED</b>                               |            |                        |                                     |                   | 32       |                                   |                                   |     |
| <b>Hoary bat (<i>Lasiurus cinereus</i>)</b>                       | CWHC       | Post-mortem exam       | Etobicoke, Ontario                  | Dec 2020          | 1        | Respiratory and intestinal tissue | PCR                               | SRI |
| <b>American marten (<i>Martes americana</i>)</b>                  | CWHC       | Post-mortem exam       | Sainte-Anne-de-Bellevue, Québec     | Nov 2020          | 1        | Respiratory and intestinal tissue | PCR                               | SRI |
| <b>Fisher (<i>Pekania pennanti</i>)</b>                           | CWHC       | Post-mortem exam       | Western Québec                      | May 2021          | 2        | Respiratory and intestinal tissue | PCR                               | SRI |
| <b>American black bear (<i>Ursus americanus</i>)</b>              | CWHC       | Post-mortem exam       | Northern Ontario                    | Sept 2020         | 2        | Respiratory tissue                | PCR                               | SRI |
|                                                                   |            |                        |                                     | Killaloe, Ontario | Oct 2020 | 1                                 | Respiratory and intestinal tissue |     |
| <b>TOTAL BLACK BEARS SAMPLED</b>                                  |            |                        |                                     |                   | 3        |                                   |                                   |     |
| <b>Atlantic white-sided dolphin (<i>Lagenorhynchus actus</i>)</b> | CWHC       | Post-mortem exam       | Carleton-sur-Mer, Québec            | June 2021         | 1        | Intestinal tissue                 | PCR                               | SRI |
|                                                                   |            |                        | Sept-Îles, Québec                   | March 2021        | 1        | Respiratory and intestinal tissue |                                   |     |
| <b>TOTAL ATLANTIC WHITE-SIDED DOLPHINS SAMPLED</b>                |            |                        |                                     |                   | 2        |                                   |                                   |     |
| <b>Harbour porpoise (<i>Phocoena phocoena</i>)</b>                | CWHC       | Post-mortem exam       | La Montée, Québec                   | Dec 2020          | 1        | Respiratory and intestinal tissue | PCR                               | SRI |
| <b>Harbour seal (<i>Phoca vitulina</i>)</b>                       | CWHC       | Post-mortem exam       | Matane, Québec                      | Dec 2020          | 1        | Respiratory and intestinal tissue | PCR                               | SRI |
| <b>Coyote (<i>Canis latrans</i>)</b>                              | CWHC       | Post-mortem exam       | Saint-Alexandre-d'Iberville, Québec | April 2021        | 1        | Respiratory and intestinal tissue | PCR                               | SRI |
| <b>Eastern wolf (<i>Canis lupus lycaon</i>)</b>                   | CWHC       | Post-mortem exam       | Algonquin Provincial Park, Ontario  | Oct 2020          | 1        | Respiratory tissue                | PCR                               | SRI |
|                                                                   |            |                        | Southern and central Ontario        |                   | 4        | Respiratory and intestinal tissue |                                   |     |
| <b>TOTAL EASTERN WOLVES SAMPLED</b>                               |            |                        |                                     |                   | 5        |                                   |                                   |     |
| <b>Grey Fox (<i>Urocyon cinereoargenteus</i>)</b>                 | CWHC       | Post-mortem exam       | Châteauguay, Québec                 | Dec 2020          | 1        | Respiratory and intestinal tissue | PCR                               | SRI |

|                                                              |      |                  |                                                        |                      |    |                                   |     |     |
|--------------------------------------------------------------|------|------------------|--------------------------------------------------------|----------------------|----|-----------------------------------|-----|-----|
| <b>Red fox<br/>(<i>Vulpes vulpes</i>)</b>                    | CWHC | Post-mortem exam | Mercier, Québec                                        | Jan 2021             | 1  | Nasal and rectal swabs            | PCR | SRI |
|                                                              |      |                  | Southwestern Québec                                    | Nov-Dec 2020         | 4  | Respiratory tissue, rectal swabs  |     |     |
|                                                              |      |                  | Southern, Ontario                                      | July-Oct 2020        | 5  | Respiratory tissue                |     |     |
|                                                              |      |                  | Dunham, Québec                                         | Dec 2020             | 1  | Respiratory and intestinal tissue |     |     |
| <b>TOTAL RED FOXES SAMPLED</b>                               |      |                  |                                                        |                      | 11 |                                   |     |     |
| <b>Virginia opossum<br/>(<i>Didelphis virginiana</i>)</b>    | CWHC | Post-mortem exam | Bolton-Est, Québec                                     | June 2021            | 1  | Nasal and rectal swabs            | PCR | SRI |
|                                                              |      |                  | Southern Ontario                                       | July-Oct 2020        | 2  | Respiratory tissue                |     |     |
|                                                              |      |                  | Southwestern Ontario, Saint-Jean-sur-Richelieu, Québec | Oct 2020, March 2021 | 3  | Respiratory and intestinal tissue |     |     |
|                                                              |      |                  | <b>TOTAL VIRGINIA OPOSSUMS SAMPLED</b>                 |                      |    |                                   |     |     |
| <b>White-tailed deer<br/>(<i>Odocoileus virginianus</i>)</b> | CWHC | Post-mortem exam | London, Ontario, Southwestern Québec                   | Oct-Dec 2020         | 3  | Respiratory and intestinal tissue | PCR | SRI |

418 a) due to the condition of the carcass, we were unable to collect lung tissue or cardiac blood from 1  
 419 individual, cardiac blood from a further 2 individuals, and rectal swabs from 2 individuals. In cases where  
 420 we could not collect cardiac blood, we instead submitted a Nobuto strip soaked in fluid from the chest  
 421 cavity for antibody testing

422

423 **Figure 1: Original locations of animals submitted for SARS-CoV-2 testing (N=776)**

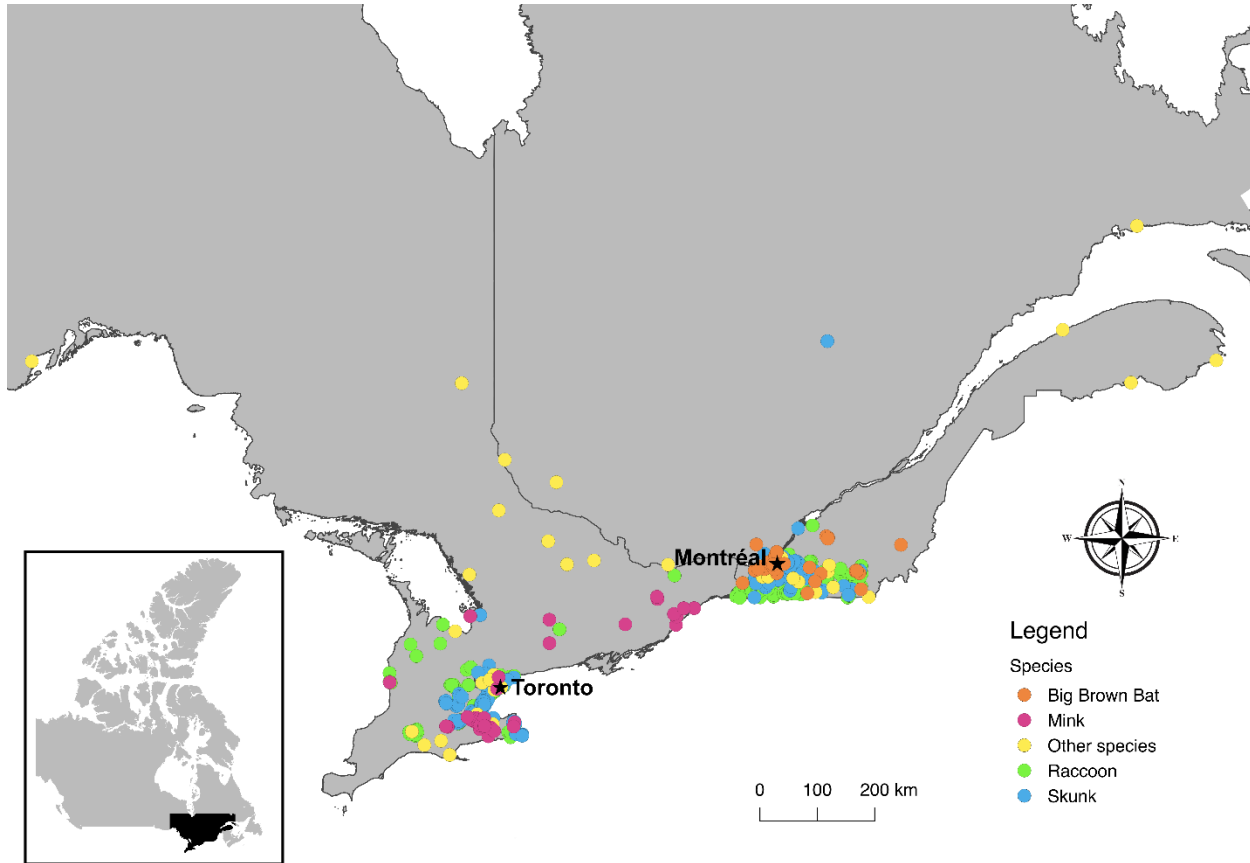

Source: https://www.biorxiv.org/content/10.1101/2021.12.02.470924v1.full.pdf
